# Supplementary material for: Reconciled rat and human metabolic networks for comparative toxicogenomics and biomarker predictions
Source: PubMed Central journal article supplement (PMC5309818; doi:10.1038/ncomms14250), 2017-02-08
Supplement: ncomms14250-s1.pdf [file ncomms14250-s1.pdf]

# 1 Supplementary Figures

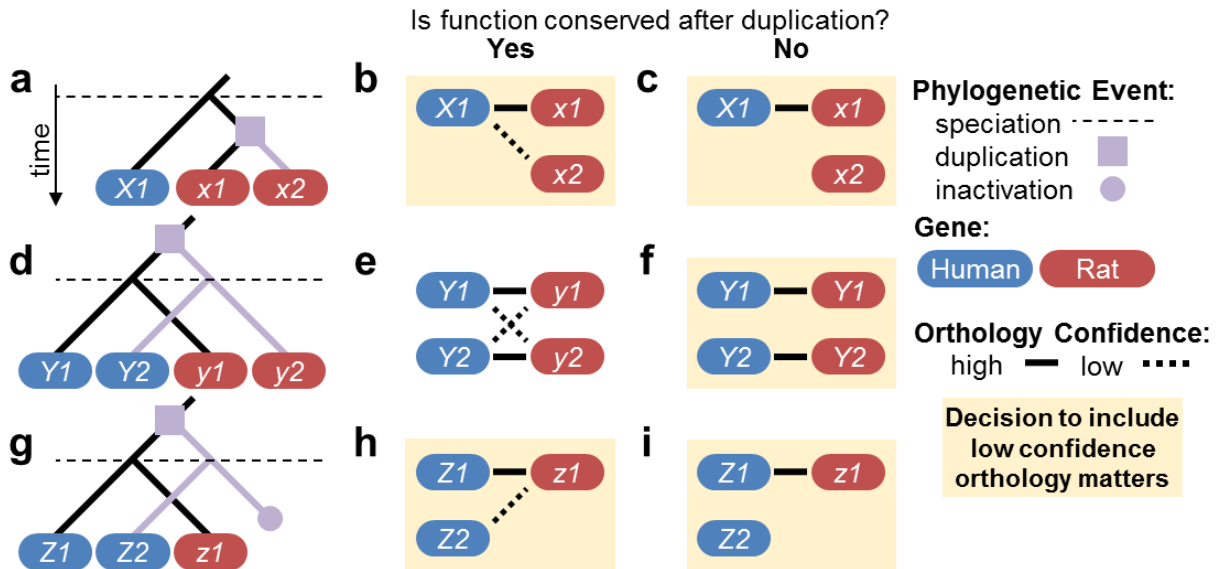

2

## 3 **Supplementary Figure 1 – Inferring function between orthologs is not trivial.**

4 (a) Example of the evolutionary history of a single gene in the most recent common ancestor of  
 5 rats and humans that underwent a duplication event in rats but not humans after speciation.

6 From this evolutionary relationship,  $X1$  may be annotated to two orthologs,  $x1$  and  $x2$ .

7 Orthologous pairs of rat and human genes separated by shorter evolutionary distances were  
 8 classified as high confidence and assigned the same number.

9 (b) Assuming that function is conserved across  $X1$ ,  $x1$ , and  $x2$  after speciation and duplication

10 events, metabolic reactions associated with  $X1$  in a human GENRE should be associated with

11  $x1$  and  $x2$  as isozymes in a rat GENRE. This example highlights the importance of including

12 multiple orthology annotations when converting GPR rules between species, even when  $X1$  and

13  $x1$  has stronger evidence for orthology than  $X1$  and  $x2$ .

14 (c) Assuming  $X1$  and  $x1$  catalyze the same metabolic function but  $x2$  evolved an affinity for a

15 different substrate after duplication, metabolic reactions associated with  $X1$  in a human GENRE

16 should only be associated with  $x1$  and not  $x2$ . This example suggests that some orthology

17 annotations may need to be discarded during the GPR conversion process (and potentially

18 assigned to a new rat-specific reaction).

19 **(d)** Evolutionary history of a single ancestral gene that was duplicated before speciation  
20 resulting in two human genes,  $Y1$  and  $Y2$ , and two rat genes,  $y1$  and  $y2$ .

21 **(e)** Assuming that function is conserved across  $Y1$ ,  $y1$ ,  $Y2$ , and  $y2$  after duplication and  
22 speciation events, metabolic reactions associated with  $Y1$  and  $Y2$  as isozymes in a human  
23 GENRE should be also be associated with  $y1$  and  $y2$  as isozymes in a rat GENRE.

24 **(f)** If the ancestral gene of  $Y2/y2$  evolved a novel function shortly before speciation and after  
25 duplication from the ancestral gene of  $Y1/y1$ , integrating low confidence orthology annotations  
26 between  $Y1/y2$  and  $Y2/y1$  into the GPR conversion process could generate GPR rules with  
27 twice as many rat genes as human genes.

28 **(g)** Evolutionary history of a single ancestral gene that was duplicated before speciation  
29 resulting in two human genes,  $Z1$  and  $Z2$ , but only one rat gene,  $z1$ , after a loss of function  
30 mutation in the rat descendent of  $Z2$ 's ancestral gene.

31 **(h)** Assuming that function is conserved between  $Z1$ ,  $z1$ , and  $Z2$ , metabolic reactions  
32 associated with  $Z1$  and  $Z2$  as isozymes in a human GENRE would only be catalyzed by  $z1$  in a  
33 rat GENRE.

34 **(i)** If  $Z1$  and  $Z2$  were known to catalyze distinct reactions in a human GENRE, low confidence  
35 orthology annotations between  $Z2/z1$  might inappropriately suggest the addition of a human-  
36 specific reaction to a rat GENRE.

37

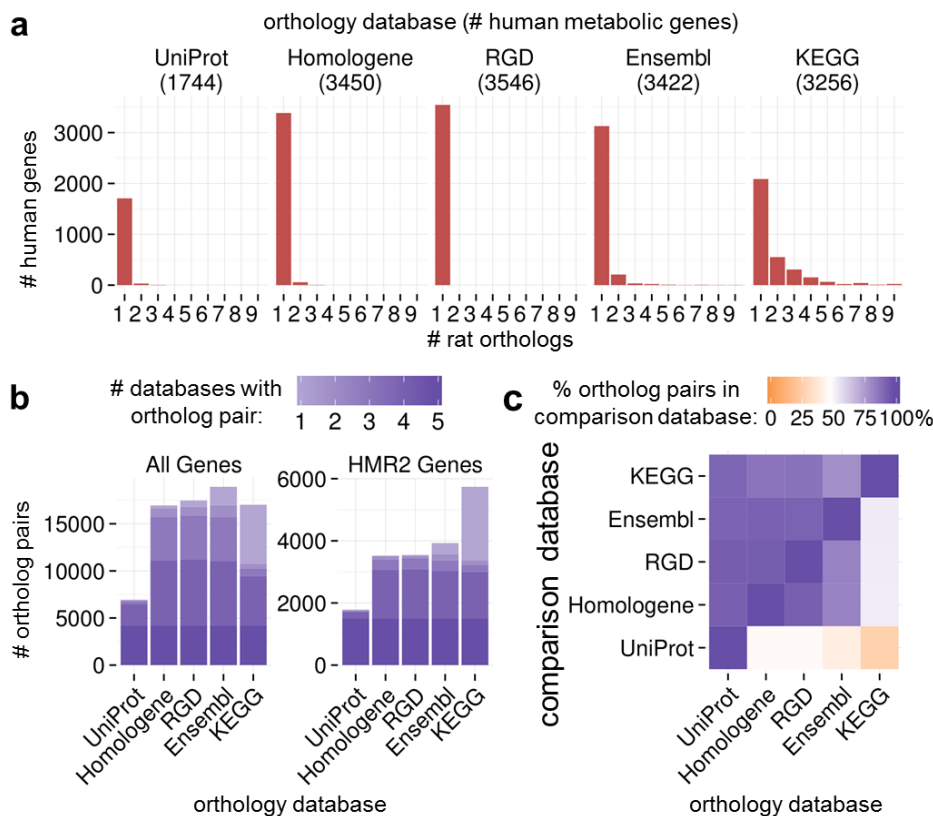

38

39 **Supplementary Figure 2 – Summary of orthology annotations between rat and human**  
 40 **genes from five orthology databases.**

41 (a) Distributions of the numbers of rat orthologs annotated to individual human genes from each  
 42 database. Numbers below each database name indicate the total numbers of human metabolic  
 43 genes from HMR2 with at least one rat ortholog. Human genes with more than 9 orthologs are  
 44 not shown.

45 (b) Numbers of ortholog pairs from each orthology database that are also annotated in other  
 46 orthology databases. Lighter and darker purple represent weaker and stronger consensus  
 47 among databases, respectively.

48 (c) Percent of ortholog pairs in each database (x-axis) that overlapped with in orthology  
 49 annotations in other databases (y-axis).

50



63 from any database (bottom row) generated rat GPR rules that were frequently larger than the  
64 original human GPR rules, unless each human gene was limited to one ortholog (bottom left  
65 panel). Requiring orthology annotations to be described by at least 3 different databases  
66 (middle row) increased the numbers of reactions automatically annotated as human-specific  
67 (blue dots) and provided human GPR rules that were frequently larger than rat GPR rules.  
68 Ultimately, the pair of selected cutoff parameters (boxed panel) used in the GPR conversion  
69 process provided balanced numbers of disproportionately sized GPR rules between draft rat  
70 and human networks.

71

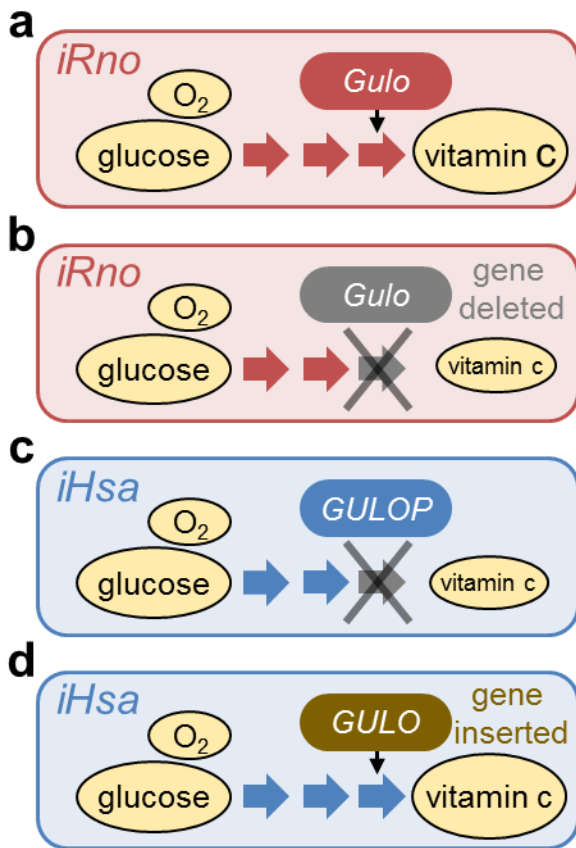

72

73 **Supplementary Figure 4 – Simplified metabolic network diagrams capturing the known**  
 74 **functional importance of L-gulonolactone oxidase in vitamin C synthesis.**

75 (a) Rats are capable of synthesizing vitamin C from limited substrates which was captured by  
 76 *iRno*. The last enzymatic step of this process is known to be catalyzed by *Gulo*.

77 (b) By simulating the deletion of *Gulo* with *iRno*, rats were no longer predicted to be capable of  
 78 synthesizing vitamin C given glucose and oxygen.

79 (c) Humans cannot synthesize vitamin C from limited substrates which was captured by *iHsa*.  
 80 The human ortholog of the rat gene, *Gulo*, is a non-functional pseudogene.

81 (d) By simulating the knock-in of a functional equivalent to *Gulo* in humans, *iHsa* was capable of  
 82 performing *de novo* vitamin C synthesis.

83



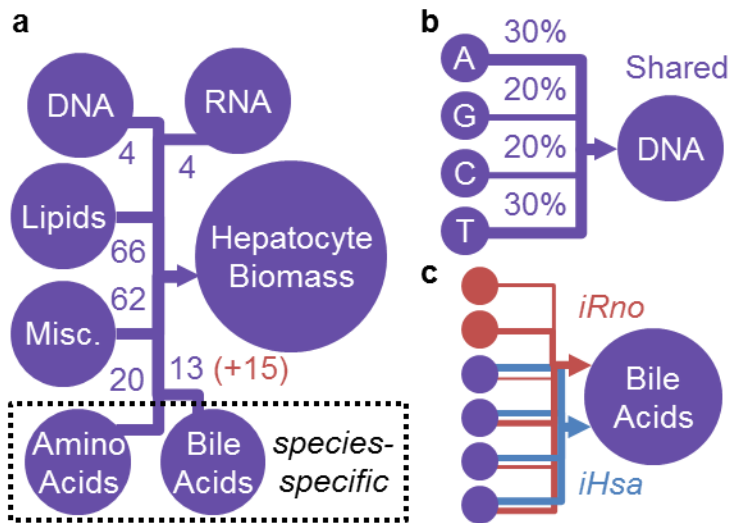

95

96 **Supplementary Figure 6 – A unified biomass reaction was created for rat and human**  
 97 **hepatocytes to enable comparative predictions using *iRno* and *iHsa*.**

98 (a) Each metabolite consumed in the hepatocyte biomass reaction represents an “average”  
 99 biomass subcomponent that is synthesized in a separate reaction (b-c). DNA, RNA, lipids, and  
 100 miscellaneous metabolites (misc) like glycogen and vitamin C were assigned species-  
 101 independent synthesis reactions. Bile acids and amino acids, which can vary significantly  
 102 between species, were assigned species-specific synthesis reactions in *iRno* and *iHsa*.  
 103 Numbers indicate how many unique metabolites are shared (purple) or rat-specific (red) within  
 104 each biomass subcomponent.

105 (b) The biomass subcomponent for an average DNA molecule is produced by consuming  
 106 experimentally-derived ratios of individual deoxynucleotides. In this reaction, more adenine (A)  
 107 and thymine (T) are incorporated into DNA than cytosine (C) and guanine (G) as indicated by  
 108 percent labels and by line thickness.

109 (c) Synthesis of an “average” bile acid was defined separately for *iRno* and *iHsa* in order to  
 110 account for species-specific metabolites (muricholic acids) and relative abundances.

111 \*Each lipid metabolite is comprised of glycerol backbones with 1-3 fatty acid chains of various  
 112 lengths, representing over 100 unique metabolites, as extensively curated in HMR2.



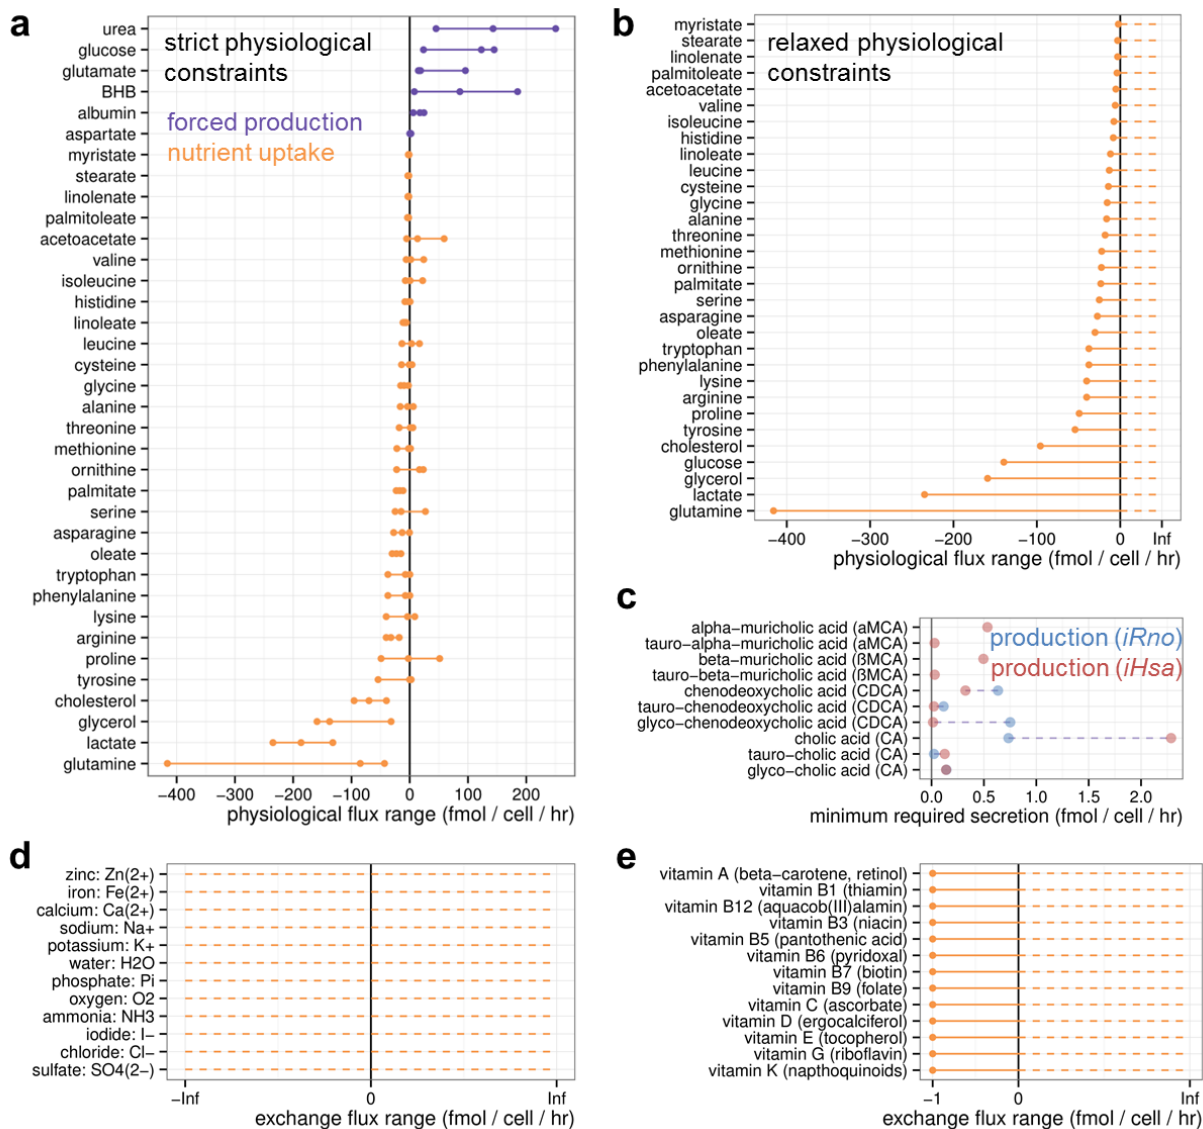

113

114 **Supplementary Figure 7 – Physiological constraints applied to *iRno* and *iHsa*.**

115 (a) Experimentally reported flux measurements from rat hepatocytes were obtained from six  
 116 separate studies to constrain *iRno* and *iHsa* with exchange boundaries that represent  
 117 physiological conditions. Minimum, median, and maximum reported exchange fluxes in fmol cell<sup>-1</sup>  
 118 hour<sup>-1</sup> are shown for each metabolite. Reaction lower bounds for exchange metabolites were  
 119 set to the minimum reported value (leftmost point) as strict physiological constraints. For  
 120 simulations of hepatocyte growth using the biomass objective, the maximum value for each  
 121 metabolite was also applied as the upper bound to exchange reactions. Exchange fluxes for

122 albumin were scaled to represent the secretion of an average amino acid from albumin because  
123 the albumin metabolite represents a full-length protein with 608 amino acids (in rats).  
124 (b) Experimentally reported flux measurements from (a) were also applied as relaxed  
125 physiological constraints for toxicogenomics biomarker predictions. Reaction lower bounds with  
126 positive values (forced production) were set to zero and upper bounds with negative values  
127 (forced consumption) were set to positive infinity ( $10^6$ ).  
128 (c) Species-specific constraints required distinct quantities of bile acids to be produced under  
129 strict physiological conditions in hepatocytes. Each point represents the lower bound applied to  
130 either *iRno* (red) or *iHsa* (blue) based on serum concentrations in rats and humans,  
131 respectively. Synthesis and secretion of  $\alpha$ - and  $\beta$ -muricholic acids in both taurine-conjugated  
132 and unconjugated forms were only requirements for *iRno*.  
133 (d) Inorganic ions were allowed unconstrained consumption rates of  $-10^6$  fmol cell<sup>-1</sup> hour<sup>-1</sup>.  
134 (e) Cofactors and vitamins considered essential in humans were set to an uptake value of 1  
135 fmol cell<sup>-1</sup> hour<sup>-1</sup> in rat and human networks.  
136

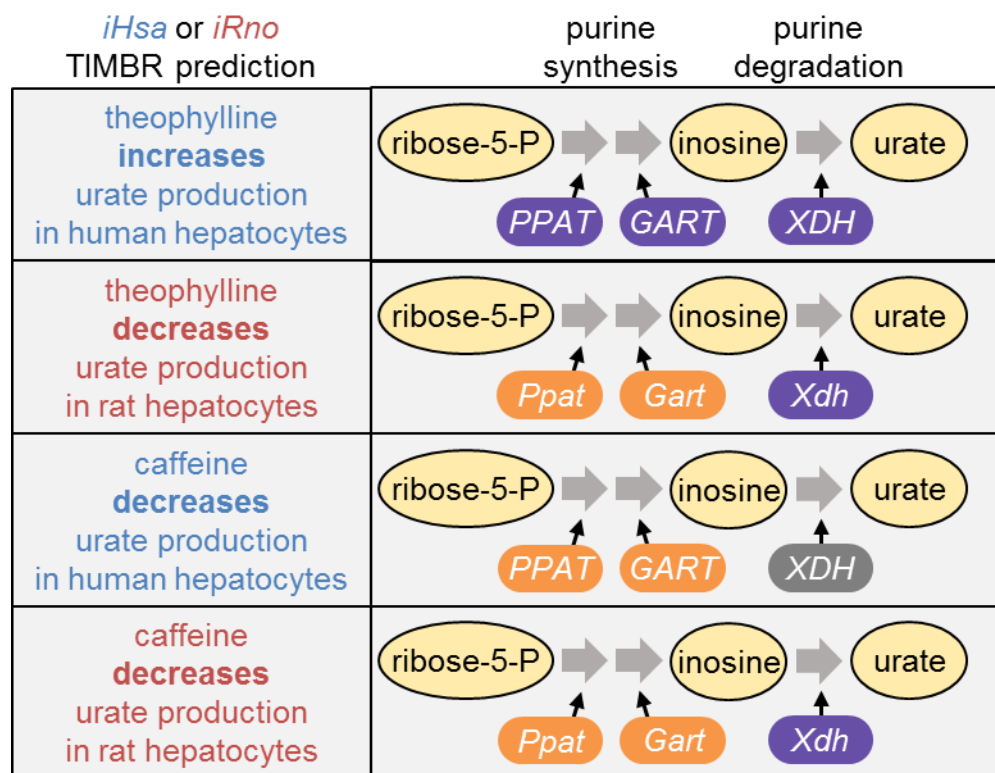

treatment-specific gene expression changes  
that contributed to species-specific differences  
in TIMBR predictions for urate production:

upregulated  
unchanged  
downregulated

137

138 **Supplementary Figure 8** – By comparing reaction weights and reaction fluxes associated with

139 urate production, we found that two human enzymes involved in *de novo* purine synthesis,

140 *PPAT* and *GART*, were upregulated in response to theophylline but downregulated in response

141 to caffeine. In contrast, rat orthologs for these genes (*Ppat* and *Gart*) were downregulated by

142 both caffeine and theophylline. A human enzyme involved in purine degradation, xanthine

143 oxidase (*XDH*), was also upregulated by theophylline but unaffected by caffeine; however, the

144 rat ortholog, *Xdh*, was upregulated in response to both compounds. These results suggest that

145 activation of purine synthesis and purine degradation pathways might also play mechanistic

146 roles in the human-specific elevation of urate after theophylline treatment.

147

## 148 Supplementary Methods

### 149 **Converting a human metabolic network into a draft rat metabolic network**

150 The first step in transforming a human metabolic model into a rat metabolic model involved  
151 assigning GPR rules consisting of rat genes to reactions in HMR2<sup>3</sup> associated with human GPR  
152 rules. Metabolic networks are typically comprised of two fundamental components: the  
153 stoichiometric relationships between metabolites and reactions, termed the stoichiometric matrix  
154 or S-matrix, and Boolean relationships between enzymes that catalyze a reaction, termed gene-  
155 protein-reaction GPR association rules. Reactions and metabolites in the S-matrix were  
156 assumed to be organism-independent because the molecular building blocks of a cell such as  
157 amino acids, nucleic acids, and membrane lipids are generally consistent across multiple  
158 species. In contrast, enzymes catalyzing reactions within the GPR rules of HMR2 were  
159 specifically encoded by the human genome, necessitating distinct formulations of GPR rules for  
160 the rat genome.

161

### 162 **Inferring metabolic function through orthology annotations**

163 To construct a genome-scale network reconstruction (GENRE) of rat metabolism, human genes  
164 assigned to metabolic reactions in a human GENRE through gene-protein-reaction (GPR)  
165 relationship rules were replaced with orthologous rat genes. Inferring metabolic function through  
166 orthology is not trivial because orthologs descended from the most recent common ancestor of  
167 rats and humans have endured more than 50 million years of evolutionary pressures  
168 (**Supplementary Fig. 1**). Additionally, mutations involving the duplication and/or inactivation of  
169 gene after speciation can lead to one-to-many, many-to-many, or many-to-one orthology  
170 annotations between rat and human genes<sup>4</sup>.

171

172 A consensus approach was used to assign a confidence score to each pair of human and rat  
173 orthologs for initial construction of the rat GENRE, *iRno*. We developed a quantitative method to  
174 infer metabolic function by incorporating the collective efforts of multiple genome annotation  
175 communities: UniProt, Homologene, RGD, Ensembl, and KEGG. Using these five orthology  
176 databases, we assigned a confidence score to deprioritize the conversion of ortholog pairs that  
177 were annotated in fewer databases. This prioritization step was implemented to filter out low  
178 confidence orthology annotations due to the possibility that function may not be conserved as  
179 described in **Supplementary Fig. 1a**. We anticipate that using orthology annotations derived  
180 from multiple computational methods will be more robust than quantitative methods such as  
181 BLAST because a single point mutation could be sufficient to alter the basic function of a  
182 metabolic enzyme while orthologs with low sequence similarity can catalyze similar reactions<sup>4</sup>.

183  
184 We compared orthology databases to highlight the advantages and disadvantages of using a  
185 consensus approach versus an individual database (**Supplementary Fig. 2**). Surprisingly, the  
186 distribution of rat orthologs annotated to each human gene varied substantially between  
187 orthology databases (**Supplementary Fig. 2a**). Over a third of human genes were annotated to  
188 two or more rat orthologs in KEGG while RGD was restricted to one rat ortholog per human  
189 gene. Despite this limitation, RGD had the highest coverage of human genes with orthology  
190 annotations compared to KEGG which had the second least. UniProt covered the fewest human  
191 genes but most orthology annotations were consistently found in at least 4 of 5 orthology  
192 databases (**Supplementary Fig. 2b**). Based on this information, orthology annotations from  
193 UniProt alone might not be sufficient to carry out the GPR conversion process at the genome-  
194 scale; however, UniProt could be useful in a consensus-based GPR conversion method by  
195 reinforcing confidence in a core subset of well-annotated ortholog pairs. Most ortholog pairs  
196 were annotated in multiple databases although KEGG also included a large number of unique  
197 ortholog pairs (**Supplementary Fig. 2b**). Each database added between 12 and 514 unique

198 human genes originally represented in HMR2 and between 16 and 2371 unique ortholog pairs  
199 not found in any of the other four databases. The percentage of non-overlapping ortholog pairs  
200 between any two databases was less than 50% with the exception of UniProt (**Supplementary**  
201 **Fig. 2c**). Despite a moderate degree of overlap, these data suggest that no consensus has  
202 been established among orthology annotation resources. As an alternative to choosing a single  
203 orthology database, a consensus approach would reduce the number of unconverted human  
204 genes and potentially capture more evolutionary differences in between rats and humans  
205 (**Supplementary Fig. 1**).

206  
207 Aggregating orthology annotations from multiple databases increases the risk of inappropriately  
208 replacing human genes with rat orthologs that do not perform the same function. To identify a  
209 high-quality subset of orthology information that preserved functionality and GPR sizes between  
210 drafts of *iRno* and *iHsa*, we developed a consensus-based GPR conversion algorithm that  
211 required orthologs to be annotated in at least 1-5 databases and limited individual human genes  
212 to be replaced by a maximum of 1-5 rat orthologs (**Supplementary Fig. 3**). The orthology  
213 database consensus score was defined as the number of databases in which a unique pair of  
214 rat and human genes was annotated. Rat and human genes were represented with Entrez gene  
215 identifiers to evaluate the presence of ortholog pairs across all five databases. Entrez gene  
216 mappings were included by default for RGD, Homologene, and KEGG orthology databases  
217 while UniProt protein entries and Ensembl gene identifiers were mapped to Entrez genes by  
218 customizing data output options within each database. When limiting the maximum number of  
219 rat orthologs that replace each human gene, orthologs were first prioritized by consensus  
220 orthology scores followed by gene scores based on genome annotation information from NCBI,  
221 UniProt, and Ensembl. Four subjective parameters were discretized into integer values between  
222 zero and five and summed to calculate gene scores: UniProt gene evidence level (protein = 5;  
223 transcript = 4; inferred from homology = 3; predicted = 2; uncertain = 1; no data = 0), UniProt

224 Annotation Score (score between 1 and 5 = value; no data = 0), Ensembl gene status (known =  
225 5; known by projection = 4; novel = 3; putative = 1; no data = 0), NCBI protein-coding evidence  
226 (evidence = 5; otherwise = 0). Rat orthology ranks for each human gene in each reaction were  
227 determined by sorting consensus orthology scores in descending order followed by rat gene  
228 score in descending order.

229  
230 Without filtering orthology annotations, rat GPR rules were often much larger than human GPR  
231 rules. After manually checking the accuracy of rat GPR rules in the context of genome  
232 annotations, orthology annotations between closely related but functionally distinct enzymes  
233 were common after converting the unfiltered set of orthologs. The orthology database score and  
234 the orthology rank were developed as filtering metrics to avoid inferring function based on non-  
235 specific orthology annotations that can be interpreted as false positives for metabolic reactions.  
236 However, accurate orthology annotations would also be discarded when applying stringent  
237 threshold values, decreasing the sensitivity of the approach. Instead of choosing arbitrary  
238 cutoffs for these parameters, a network-driven approach was developed to identify a subset of  
239 orthology annotations that maintains a reasonable balance between sensitivity and specificity.

240  
241 A network-driven approach was used to select cutoff values for the minimum orthology  
242 database score and the maximum orthology rank. We found that converting all orthology  
243 annotations present in any of the 5 orthology databases generated rat GPR rules with  
244 disproportionately more genes compared to the original human GPR rules (bottom row of  
245 panels in **Supplementary Fig. 3**). We assumed that this difference was more likely explained  
246 by a large number of false positive orthology annotations than an actual genome-scale  
247 difference in the redundancies between rat and human metabolic enzymes. Alternatively,  
248 requiring orthologs to be annotated in all 5 databases generated much smaller rat GPR rules for  
249 shared reactions and introduced a large number of human-specific reactions that would

250 substantially reduce the functionality of *iRno* (top row of panels in **Supplementary Fig. 3**). We  
251 found a balanced relationship between the numbers of reactions with larger rat GPR rules than  
252 human and numbers of reactions with larger human GPR rules than rat by removing orthology  
253 annotations found in only one database and restricting the replacement of each human gene to  
254 two rat orthologs (selected cutoff panel in **Supplementary Fig. 3**). Additionally, the selected  
255 cutoff preserved the same functionalities as the relaxed cutoff when evaluating metabolic tasks  
256 from HMR2<sup>3</sup>. This filtering step was important because methods that integrate gene expression  
257 data or simulate the impact of genomic alterations rely heavily on the number of redundant  
258 enzymes associated with a reaction<sup>5,6</sup>.

259

### 260 **Identifying species-specific reactions**

261 We initially explored the Kyoto Encyclopedia for Genes and Genomes<sup>7,8</sup> (KEGG) database as a  
262 starting point for identifying species-specific differences between rat and human metabolism.  
263 Prior to adding potential new reactions to *iRno* and *iHsa*, existing reactions and metabolites  
264 were updated with annotations to external databases. Throughout the entire reconstruction  
265 process, 742 reactions and 354 metabolites were assigned new or updated KEGG annotations  
266 to replace empty, incorrect, generic, or obsolete KEGG identifiers. The numbers of unique  
267 KEGG REACTION and KEGG COMPOUND identifiers represented across *iRno* and *iHsa*  
268 increased from 1376 and 1650 to 1702 and 1721, respectively, compared to HMR2  
269 **(Supplementary Data 3)**.

270

271 Updated annotations were necessary to avoid creating duplicate entries of unique reactions or  
272 metabolites and to facilitate assigning GPR rules to 122 reactions not previously associated with  
273 any genes. For example, the metabolic reaction catalyzing the conversion of threonine to  
274 glycine and acetaldehyde was originally present in HMR2 as a spontaneous (non-enzymatic)  
275 reaction with no external annotations<sup>3</sup>. This reaction was identified in the KEGG database as the



276 rat-specific reaction, threonine aldolase (R00751). As a result, this reaction was assigned a new  
277 GPR rule in *iRno* and disabled in *iHsa*. Of 18 rat-specific KEGG reaction annotations: 5 were  
278 already represented and removed from *iHsa*; 11 were added as new rat-specific reactions *iRno*;  
279 and 2 redundant with other rat-specific reactions were ignored (**Supplementary Data 8**). Of 75  
280 human-specific KEGG annotations: 4 were already represented in *iHsa*, and had been disabled  
281 in *iRno* as a result of the GPR conversion process; 14 were re-classified as shared reactions  
282 after identifying suitable rat orthologs; and 57 involved in peripheral pathways such as  
283 xenobiotic metabolism were ignored (**Supplementary Data 8**).

284  
285 *iRno* and *iHsa* were expanded and updated in parallel when possible to maintain consistency in  
286 the reconstruction process. For each new reaction added, rat and human GPR rules were  
287 constructed manually using evidence from experimental literature and functional annotation  
288 databases (**Supplementary Data 1**). Evidence supporting the presence of a reaction in one  
289 organism and not the other was necessary for classifying a reaction as species-specific.  
290 Otherwise, reactions directly associated with rat and human enzymes or indirectly through  
291 orthology annotations were assumed to be shared. In total, 69 biochemical, 32 transport, 40  
292 exchange reactions were added. All transport and exchange reactions were shared by *iRno* and  
293 *iHsa* and nine biochemical reactions were unique to *iRno*.

294  
295 *iRno* and *iHsa* were expanded to include species-specific reactions from the KEGG database  
296 and literature sources. Lists of reactions and modules linked to genes annotated in humans  
297 (*hsa*) and rats (*rno*) were obtained using KEGG's Representational state transfer (REST)-style  
298 interface (<http://www.kegg.jp/kegg/rest/keggapi.html>). Reactions linked to humans and not rats  
299 or to rats and not humans were manually investigated for their feasibility as actual species-  
300 specific reactions. To identify potential differences between the metabolic capabilities of rats  
301 and humans from literature, various searches were performed using PubMed

302 (<http://www.ncbi.nlm.nih.gov/pubmed>) with combinations of the keywords: rat, human,  
303 comparative genomics, cross-species, species-specific, metabolism, metabolic deficiency. No  
304 comprehensive comparative analyses were identified other than original publication of the rat  
305 genome<sup>9</sup>.

306

### 307 **Curating GPR rules to include complex relationships**

308 GPR rules comprised of more than one gene were initially limited to isozymic “or” relationships  
309 because none of the 1390 unique GPR rules in HMR2 described relationships between subunits  
310 in a protein complex<sup>3</sup>. To overcome this limitation, GPR rules were manually constructed to  
311 include “and” logical operators for both rat and human models when possible. Evidence  
312 supporting the requirement of multiple enzymatic subunits to perform a metabolic function were  
313 obtained from functional annotation databases and experimental literature (**Supplementary**  
314 **Data 1**). We also compared complex human GPR rules from the second largest human  
315 GENRE, *Homo sapiens* Recon 2 (versions 2.0.3 and 2.0.4), with an early draft of *iHsa* in order  
316 to convert isozymic relationships into complex relationships.

317

### 318 **Formatting complex GPR rules for TIMBR**

319 For gene expression integration using TIMBR (Transcriptionally-Inferred Metabolic Biomarker  
320 Response), GPR rules involving redundant subunits in a protein complex were structured  
321 according to the following format: (*A1* or *A2*) and (*B1* or *B2*), where redundant enzymes are  
322 grouped together for each subunit. With this GPR format, a TIMBR weight represents an  
323 average change in gene expression for the subunit that experienced the largest perturbation.  
324 Because TIMBR summarizes directional changes instead of absolute values, the following  
325 alternative Boolean representation could yield different results: (*A1* and *B1*) or (*A1* and *B2*) or  
326 (*A2* and *B1*) or (*A2* and *B2*), where non-redundant subunits are grouped together for each  
327 possible protein complex. With this alternative representation, a reaction weight would represent

328 an average of the largest gene expression changes observed for each possible protein  
329 complex. Although both approaches are conceptually similar, TIMBR implements the former  
330 approach that summarizes gene expression changes independently for each subunit.

331

### 332 **Recapitulating biological functions with metabolic tasks**

333 Curated rat and human models successfully performed all 327 tasks (**Supplementary Data 4**).  
334 Removal of reactions from *iHsa* as part of the reconciliation process did not affect the  
335 completion of any metabolic tasks. Furthermore, the addition of new reactions to *iRno* and *iHsa*  
336 did not enable completion of 19 tasks explicitly intended to fail such as the *de novo* synthesis of  
337 essential amino. An important advantage of *iHsa* (and *iRno*) is that one unit of glucose  
338 regenerates 25.6 units of ATP with an unlimited supply of oxygen and 2 units of ATP in the  
339 absence of oxygen. Several new tasks were added that tested whether *iRno* and *iHsa* could use  
340 thermodynamically infeasible loops to regenerate ATP from ADP without a carbon-based  
341 energy or “fuel” source like glucose.

342

343 The presence or absence of all KEGG MODULEs were queried for rats and humans, revealing  
344 2 human-specific modules and 1 rat-specific module. Each module described the ability of an  
345 organism to synthesize a product *de novo* from a starting substrate, as reported above for the  
346 rat-specific module M00129 where vitamin C can be synthesized from glucose. In KEGG, the  
347 human-specific modules for chenodeoxycholic acid synthesis from cholesterol and degradation  
348 of heparan sulfate into disaccharides were each characterized by a single missing enzyme in  
349 rats. For chenodeoxycholic acid synthesis, the blocked reaction, 3-alpha-hydroxysteroid  
350 dehydrogenase (EC 1.1.1.50) was not annotated for any rat enzymes. Upon review of  
351 experimental literature, the rat gene, *Akr1c14*, was reported to demonstrate this activity<sup>10</sup>,  
352 suggesting that this module be reclassified as complete in both rats and humans. For heparan

353 sulfate degradation, manually assigning the rat enzyme, *Hgsnat*, to its known function (EC  
354 2.3.1.78) was able to recapitulate this previously annotated human-specific function in rats<sup>11</sup>.

355

### 356 **Capturing the importance of L-gulonolactone oxidase in vitamin C synthesis**

357 L-gulonolactone oxidase (*Gulo*) has been described as the critical enzyme for vitamin C  
358 synthesis that differentiates rats from humans<sup>12</sup> (**Supplementary Fig. 4a**). Using flux variability  
359 analysis (FVA)<sup>13</sup>, 10 reactions were required by *iRno* to synthesize vitamin C under glucose  
360 minimal media conditions. Only one enzymatic reaction required for vitamin C synthesis in *iRno*  
361 that was also absent in *iHsa* was L-gulonolactone oxidase (EC 1.1.3.8) (**Supplementary Fig.**  
362 **4b**). In agreement with the KEGG MODULE, “ascorbate biosynthesis, animals” (M00129), L-  
363 gulonolactone oxidase (K00103) was annotated as the only enzymatic step missing in humans  
364 (**Supplementary Fig. 4c**). Additionally, deleting *Gulo* blocked the ability of *iRno* to produce  
365 vitamin C, consistent with a *Gulo*-deficient strain of rat developed to study scurvy<sup>14</sup>. Artificially  
366 adding L-gulonolactone oxidase to *iHsa* would enable the human model to successfully  
367 complete the vitamin C synthesis task (**Supplementary Fig. 4d**), as previously described in a  
368 study that restored vitamin C synthesis in a human cell line using the murine ortholog of *Gulo*<sup>15</sup>.

369

370 Vitamin C consumption was required for biomass synthesis in *iHsa* but not in *iRno*. The  
371 functional impact of vitamin C deficiency on cellular growth was simulated by constraining the  
372 uptake of the vitamin C exchange reaction to 1 fmol cell<sup>-1</sup> hour<sup>-1</sup> (physiological consumption  
373 rate<sup>16</sup>) or 0 (vitamin C deficiency) (**Supplementary Data 4**). The maximum theoretical flux  
374 through the biomass reaction of each model, containing equimolar amounts of vitamin C per cell  
375 (0.06 fmol cell<sup>-1</sup>), was measured *in silico* using flux balance analysis<sup>17</sup>. When the uptake rate of  
376 vitamin C was decreased below 25% of normal physiological rates, the maximum possible  
377 growth rate was reduced exclusively in *iHsa* and not in *iRno*. Despite this distinction, limiting the  
378 uptake of vitamin C within an order of magnitude of the physiological uptake rate had no effect

379 on growth, suggesting that vitamin C is not likely a growth rate-limiting factor under normal  
380 conditions in either organism.

381

## 382 **Defining physiological conditions and biomass compositions for human and rat** 383 **hepatocytes**

384 A novel system of reactions representing biomass synthesis was developed to enable cross-  
385 species predictions of growth between *iRno* and *iHsa* (**Supplementary Fig. 6**). New biomass  
386 metabolites were defined for each macromolecular subcomponent present in a hepatocyte  
387 including (percent of dry weight): DNA (2.3%), RNA (3.7%), lipids (17%), protein-incorporated  
388 amino acids (59%), free amino acids (3.7%), bile acids (.1%), and miscellaneous metabolites  
389 (11%) (**Supplementary Fig. 6a**). Miscellaneous metabolites included vitamins, and cofactors,  
390 and other metabolites present at high intracellular concentrations such as vitamin C, citrate, and  
391 glutathione. The relative abundances of individual metabolites within each subgroup were  
392 determined from several previously published studies<sup>16,18-32</sup>. Data directly comparing metabolite  
393 profiles between human and rat hepatocytes were available for amino acids and bile acids. To  
394 account for these differences within a generalized framework, species-specific reactions were  
395 added to *iRno* and *iHsa* for the synthesis of these two biomass metabolites (**Supplementary**  
396 **Fig. 6b**). For biomass components with similar compositions between rats and humans, shared  
397 reactions were used to produce estimated hepatocyte-specific compositions (**Supplementary**  
398 **Fig. 6c**). This new cross-species framework can be extended to formulate new biomass  
399 compositions for cross-species analyses within and between various cell or tissue types using  
400 the same centralized biomass precursor metabolites.

401

402 Physiological ranges for exchange reactions were determined using a consensus approach  
403 (**Supplementary Fig. 7**). Experimentally measured metabolite consumption and secretion rates  
404 were obtained for rat liver cells and rat hepatocytes from 6 existing studies<sup>3,33-38</sup>. Exchange

405 reaction equations were formulated such that negative and positive fluxes represented  
406 consumption and secretion, respectively. Flux measurements were standardized to units of fmol  
407 cell<sup>-1</sup> hour<sup>-1</sup> using previously described conversion rates<sup>39</sup>. In order to normalize quantitative  
408 measurements from different experimental systems, absolute flux measurements were median-  
409 scaled using metabolites measured in all 6 experiments to the average median value of the 3 *in*  
410 *vitro* experiments. To assign experimental observations as physiological constraints, lower and  
411 upper bounds for exchange reactions were determined based on minimum and maximum  
412 normalized values across all experimental observations.

413  
414 Physiological constraints were applied to *iRno* and *iHsa* as either relaxed constraints for  
415 treatment-induced biomarker predictions (**Supplementary Fig. 7a**) or strict constraints for  
416 quantitative simulations of hepatocyte biomass (**Supplementary Fig. 7b**). Under relaxed and  
417 strict physiological constraints, lower bound values less than zero were used to allow nutrient  
418 uptake of measured metabolites (**Supplementary Fig. 7a**). Under strict physiological  
419 constraints, lower bound values greater than zero were also applied requiring secretion of urea,  
420 glucose, glutamate, aspartate, 3-hydroxybutyrate, and albumin. Upper bound values were also  
421 applied to require consumption or limit secretion of metabolites under strict physiological  
422 constraints (**Supplementary Fig. 7b**). Additionally, estimated uptake rates for 12 inorganic ions  
423 (**Supplementary Fig. 7d**) and 13 essential nutrients (**Supplementary Fig. 7e**) were assigned  
424 under both relaxed and strict physiological constraints. For metabolites with flux measurements  
425 available in rat and human hepatocytes, differences between species were considered  
426 negligible relative to feasible flux ranges with the exception of bile acids.

427  
428 Under strict physiological conditions, species-specific constraints were formulated for the export  
429 of bile salts by hepatocytes (**Supplementary Fig. 7c**). In addition to the unique ability of rats to  
430 synthesize muricholic acids, the relative abundances of bile acids differed significantly in a

431 recent study that compared serum bile acid profiles of rats and humans<sup>33</sup>. Rat-specific and  
432 human-specific reactions were defined to produce an average bile salt measured for each  
433 organism, similar to species-specific reactions formulated for biomass synthesis. Under strict  
434 physiological conditions, a minimum flux of 0.4 fmol cell<sup>-1</sup> hour<sup>-1</sup> was required through a unified  
435 exchange reaction representing average bile salt production.

## Supplementary References

- 436 1 Thiele, I. *et al.* A community-driven global reconstruction of human metabolism. *Nat*  
437 *Biotechnol* **31**, 419-425, doi:10.1038/nbt.2488 (2013).
- 438 2 Shlomi, T., Cabili, M. N. & Ruppin, E. Predicting metabolic biomarkers of human inborn  
439 errors of metabolism. *Mol Syst Biol* **5**, 263, doi:10.1038/msb.2009.22 (2009).
- 440 3 Mardinoglu, A. *et al.* Genome-scale metabolic modelling of hepatocytes reveals serine  
441 deficiency in patients with non-alcoholic fatty liver disease. *Nat Commun* **5**, 3083,  
442 doi:10.1038/ncomms4083 (2014).
- 443 4 Gabaldon, T. & Koonin, E. V. Functional and evolutionary implications of gene orthology.  
444 *Nature reviews. Genetics* **14**, 360-366, doi:10.1038/nrg3456 (2013).
- 445 5 Blazier, A. S. & Papin, J. A. Integration of expression data in genome-scale metabolic  
446 network reconstructions. *Front Physiol* **3**, 299, doi:10.3389/fphys.2012.00299 (2012).
- 447 6 Machado, D. & Herrgard, M. Systematic evaluation of methods for integration of  
448 transcriptomic data into constraint-based models of metabolism. *PLoS Comput Biol* **10**,  
449 e1003580, doi:10.1371/journal.pcbi.1003580 (2014).
- 450 7 Kanehisa, M. & Goto, S. KEGG: kyoto encyclopedia of genes and genomes. *Nucleic*  
451 *Acids Res* **28**, 27-30 (2000).
- 452 8 Kanehisa, M. *et al.* Data, information, knowledge and principle: back to metabolism in  
453 KEGG. *Nucleic Acids Res* **42**, D199-205, doi:10.1093/nar/gkt1076 (2014).
- 454 9 Gibbs, R. A. *et al.* Genome sequence of the Brown Norway rat yields insights into  
455 mammalian evolution. *Nature* **428**, 493-521, doi:10.1038/nature02426 (2004).
- 456 10 Penning, T. M., Jin, Y., Heredia, V. V. & Lewis, M. Structure-function relationships in  
457 3alpha-hydroxysteroid dehydrogenases: a comparison of the rat and human isoforms. *J*  
458 *Steroid Biochem Mol Biol* **85**, 247-255 (2003).
- 459 11 Bame, K. J. & Rome, L. H. Acetyl-coenzyme A:alpha-glucosaminide N-acetyltransferase.  
460 Evidence for an active site histidine residue. *The Journal of biological chemistry* **261**,  
461 10127-10132 (1986).
- 462 12 Kawai, T., Nishikimi, M., Ozawa, T. & Yagi, K. A missense mutation of L-gulono-gamma-  
463 lactone oxidase causes the inability of scurvy-prone osteogenic disorder rats to  
464 synthesize L-ascorbic acid. *The Journal of biological chemistry* **267**, 21973-21976  
465 (1992).
- 466 13 Mahadevan, R. & Schilling, C. H. The effects of alternate optimal solutions in constraint-  
467 based genome-scale metabolic models. *Metab Eng* **5**, 264-276 (2003).
- 468 14 Mizushima, Y., Harauchi, T., Yoshizaki, T. & Makino, S. A rat mutant unable to  
469 synthesize vitamin C. *Experientia* **40**, 359-361 (1984).

- 470 15 Ha, M. N. *et al.* Functional rescue of vitamin C synthesis deficiency in human cells using  
471 adenoviral-based expression of murine l-gulono-gamma-lactone oxidase. *Genomics* **83**,  
472 482-492, doi:10.1016/j.ygeno.2003.08.018 (2004).
- 473 16 Lykkesfeldt, J., Hagen, T. M., Vinarsky, V. & Ames, B. N. Age-associated decline in  
474 ascorbic acid concentration, recycling, and biosynthesis in rat hepatocytes--reversal with  
475 (R)-alpha-lipoic acid supplementation. *FASEB J* **12**, 1183-1189 (1998).
- 476 17 Varma, A. & Palsson, B. O. Stoichiometric flux balance models quantitatively predict  
477 growth and metabolic by-product secretion in wild-type *Escherichia coli* W3110. *Applied*  
478 *and environmental microbiology* **60**, 3724-3731 (1994).
- 479 18 Olsson, J. M., Eriksson, L. C. & Dallner, G. Lipid compositions of intracellular  
480 membranes isolated from rat liver nodules in Wistar rats. *Cancer Res* **51**, 3774-3780  
481 (1991).
- 482 19 Yamada, M. *et al.* Biochemical characteristics of isolated rat liver stellate cells.  
483 *Hepatology* **7**, 1224-1229 (1987).
- 484 20 Bartles, J. R., Feracci, H. M., Stieger, B. & Hubbard, A. L. Biogenesis of the rat  
485 hepatocyte plasma membrane in vivo: comparison of the pathways taken by apical and  
486 basolateral proteins using subcellular fractionation. *J Cell Biol* **105**, 1241-1251 (1987).
- 487 21 Benga, G. & Ferdinand, W. Amino acid composition of rat and human liver microsomes  
488 in normal and pathological conditions. *Biosci Rep* **15**, 111-116 (1995).
- 489 22 Yang, L. Y., Kuksis, A., Myher, J. J. & Steiner, G. Origin of triacylglycerol moiety of  
490 plasma very low density lipoproteins in the rat: structural studies. *J Lipid Res* **36**, 125-  
491 136 (1995).
- 492 23 Gibbons, G. F., Khurana, R., Odwell, A. & Seelaender, M. C. Lipid balance in HepG2  
493 cells: active synthesis and impaired mobilization. *J Lipid Res* **35**, 1801-1808 (1994).
- 494 24 Barle, H. *et al.* The concentrations of free amino acids in human liver tissue obtained  
495 during laparoscopic surgery. *Clin Physiol* **16**, 217-227 (1996).
- 496 25 Triguero, A. *et al.* Liver intracellular L-cysteine concentration is maintained after  
497 inhibition of the trans-sulfuration pathway by propargylglycine in rats. *Br J Nutr* **78**, 823-  
498 831 (1997).
- 499 26 Turunen, M., Olsson, J. & Dallner, G. Metabolism and function of coenzyme Q. *Biochim*  
500 *Biophys Acta* **1660**, 171-199 (2004).
- 501 27 Niklas, J., Noor, F. & Heinze, E. Effects of drugs in subtoxic concentrations on the  
502 metabolic fluxes in human hepatoma cell line Hep G2. *Toxicol Appl Pharmacol* **240**, 327-  
503 336, doi:10.1016/j.taap.2009.07.005 (2009).
- 504 28 Zhao, M. *et al.* Vitamin B-6 restriction impairs fatty acid synthesis in cultured human  
505 hepatoma (HepG2) cells. *Am J Physiol Endocrinol Metab* **304**, E342-351,  
506 doi:10.1152/ajpendo.00359.2012 (2013).
- 507 29 Momchilova, A. *et al.* Resveratrol alters the lipid composition, metabolism and peroxide  
508 level in senescent rat hepatocytes. *Chem Biol Interact* **207**, 74-80,  
509 doi:10.1016/j.cbi.2013.10.016 (2014).
- 510 30 Qin, X. Y. *et al.* The effect of acyclic retinoid on the metabolomic profiles of hepatocytes  
511 and hepatocellular carcinoma cells. *PLoS One* **8**, e82860,  
512 doi:10.1371/journal.pone.0082860 (2013).
- 513 31 da Silva, V. R. *et al.* Targeted metabolomics and mathematical modeling demonstrate  
514 that vitamin B-6 restriction alters one-carbon metabolism in cultured HepG2 cells. *Am J*  
515 *Physiol Endocrinol Metab* **307**, E93-101, doi:10.1152/ajpendo.00697.2013 (2014).
- 516 32 Setchell, K. D. *et al.* Bile acid concentrations in human and rat liver tissue and in  
517 hepatocyte nuclei. *Gastroenterology* **112**, 226-235 (1997).
- 518 33 Garcia-Canaveras, J. C., Donato, M. T., Castell, J. V. & Lahoz, A. Targeted profiling of  
519 circulating and hepatic bile acids in human, mouse, and rat using a UPLC-MRM-MS-  
520 validated method. *J Lipid Res* **53**, 2231-2241, doi:10.1194/jlr.D028803 (2012).



- 521 34 Yang, H., Roth, C. M. & Ierapetritou, M. G. Analysis of amino acid supplementation  
522 effects on hepatocyte cultures using flux balance analysis. *OMICS* **15**, 449-460,  
523 doi:10.1089/omi.2010.0070 (2011).
- 524 35 Chan, C., Berthiaume, F., Lee, K. & Yarmush, M. L. Metabolic flux analysis of cultured  
525 hepatocytes exposed to plasma. *Biotechnol Bioeng* **81**, 33-49, doi:10.1002/bit.10453  
526 (2003).
- 527 36 Lee, K., Berthiaume, F., Stephanopoulos, G. N. & Yarmush, M. L. Profiling of dynamic  
528 changes in hypermetabolic livers. *Biotechnol Bioeng* **83**, 400-415, doi:10.1002/bit.10682  
529 (2003).
- 530 37 Banta, S., Yokoyama, T., Berthiaume, F. & Yarmush, M. L. Effects of  
531 dehydroepiandrosterone administration on rat hepatic metabolism following thermal  
532 injury. *J Surg Res* **127**, 93-105, doi:10.1016/j.jss.2005.01.001 (2005).
- 533 38 Banta, S. *et al.* Contribution of gene expression to metabolic fluxes in hypermetabolic  
534 livers induced through burn injury and cecal ligation and puncture in rats. *Biotechnol*  
535 *Bioeng* **97**, 118-137, doi:10.1002/bit.21200 (2007).
- 536 39 Sohlenius-Sternbeck, A. K. Determination of the hepatocellularity number for human,  
537 dog, rabbit, rat and mouse livers from protein concentration measurements. *Toxicol In*  
538 *Vitro* **20**, 1582-1586, doi:10.1016/j.tiv.2006.06.003 (2006).
